# Supplementary material for: (−)-Epicatechin mitigates high fat diet-induced neuroinflammation and altered behavior in mice
Source: Royal Society of Chemistry journal article supplement (doi:10.1039/d0fo00486c), 2020-01-01
Supplement: d0fo00486c2.pdf [file d0fo00486c2.pdf]

**Supplementary Table 1.** Composition of control and high fat diet. The original recipe is from Envigo (Envigo, Indianapolis, IN). The product codes are TD.06414 (high fat diet) and TD.06416 (control diet). The original documents containing nutrient information and ingredients are found in Envigo ([www.envigo.com](http://www.envigo.com)). All ingredients are purchased from Dyets, Inc. (Dyets, Inc., Bethlehem, PA).

|                             | <b>High Fat Diet<br/>(5.1kcal/g)</b> | <b>Control Diet<br/>(3.7kcal/g)</b> |
|-----------------------------|--------------------------------------|-------------------------------------|
| <b>Nutrient Information</b> | <b>% kcal from</b>                   | <b>% kcal from</b>                  |
| Protein                     | 18.4                                 | 20.1                                |
| Carbohydrate                | 21.3                                 | 69.8                                |
| Fat                         | 60.3                                 | 10.2                                |
|                             |                                      |                                     |
| <b>Ingredient</b>           | <b>g/kg</b>                          | <b>g/kg</b>                         |
| Casein                      | 265                                  | 210                                 |
| L-Cystine                   | 4                                    | 3                                   |
| Corn Starch                 |                                      | 280                                 |
| Dextrose                    | 160                                  | 50                                  |
| Sucrose                     | 90                                   | 325                                 |
| Lard                        | 310                                  | 20                                  |
| Soybean Oil                 | 30                                   | 20                                  |
| Cellulose                   | 65.5                                 | 37.15                               |
| Mineral Mix                 | 48                                   | 35                                  |
| Calcium Phosphate, dibasic  | 3.4                                  | 2                                   |
| Vitamin Mix                 | 21                                   | 15                                  |
| Choline Bitartrate          | 3                                    | 2.75                                |
| Yellow Food Color           |                                      | 0.1                                 |
| Pink Food Color             | 0.1                                  |                                     |
