# Supplementary figures and images for: (−)-Epicatechin mitigates high fat diet-induced neuroinflammation and altered behavior in mice
Source: Royal Society of Chemistry journal article supplement (doi:10.1039/d0fo00486c), 2020-01-01

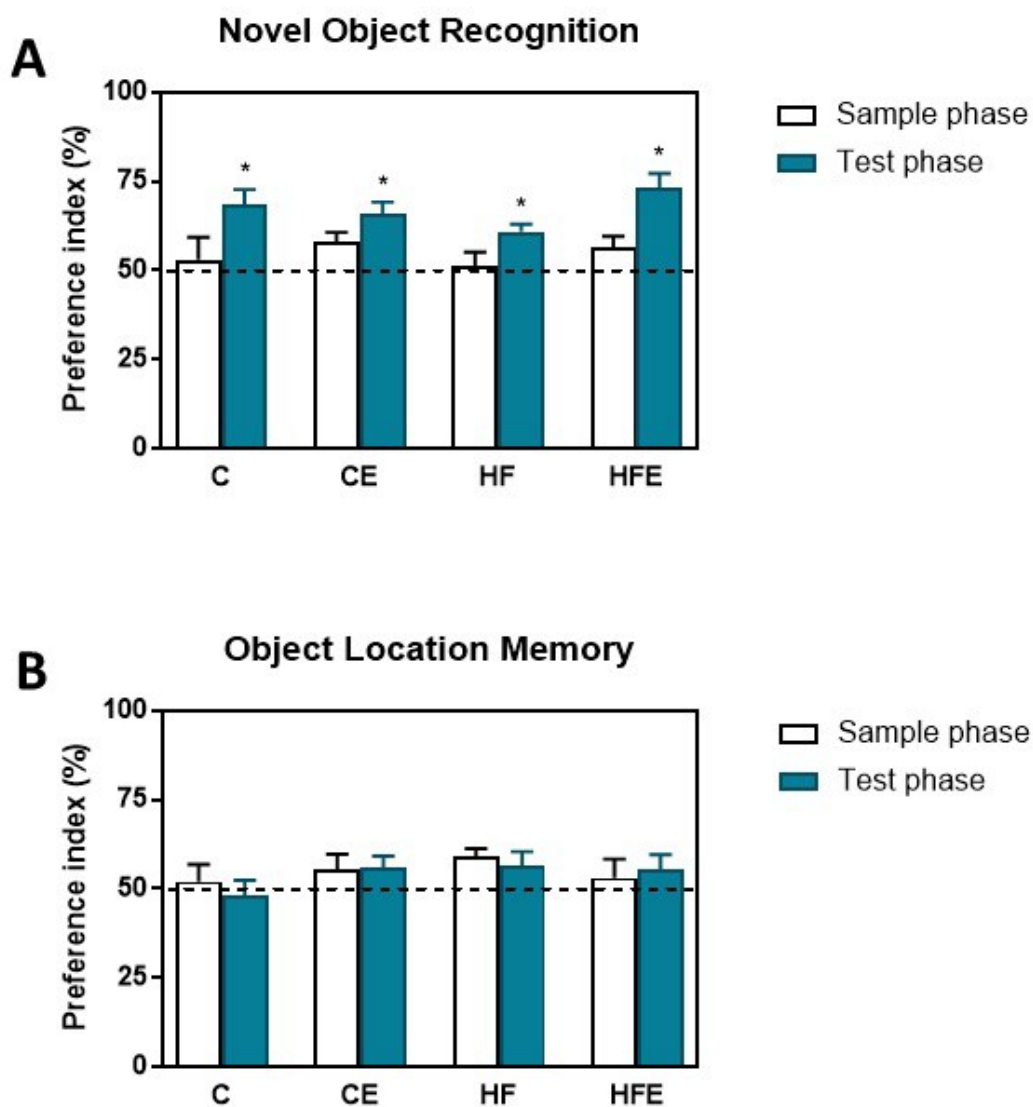

Supplemental Figure 1

Supplement: d0fo00486c1.pdf [file d0fo00486c1.pdf]
